# Supplementary material for: YIPF3 and YIPF4 regulate autophagic turnover of the Golgi apparatus
Source: PubMed Central journal article supplement (PMC11250848; doi:10.1038/s44318-024-00131-3), 2024-05-31
Supplement: 44318_2024_131_MOESM1_ESM.pdf [file 44318_2024_131_MOESM1_ESM.pdf]

# **YIPF3 and YIPF4 regulate autophagic turnover of the Golgi apparatus**

Shinri Kitta, Tatsuya Kaminishi, Momoko Higashi, Takayuki Shima, Kohei Nishino,  
Nobuhiro Nakamura, Hidetaka Kosako, Tamotsu Yoshimori\*, Akiko Kuma\*

\*Corresponding author: Tamotsu Yoshimori, tamyoshi@fbs.osaka-u.ac.jp  
Akiko Kuma, kuma@fbs.osaka-u.ac.jp

## **Table of contents**

| <b>Page</b> | <b>Content</b>                                                                                              |
|-------------|-------------------------------------------------------------------------------------------------------------|
| <b>2</b>    | <b>Appendix Figure S1.</b> The Golgi morphology is not changed in cells stably coexpressing YIPF3 and YIPF4 |

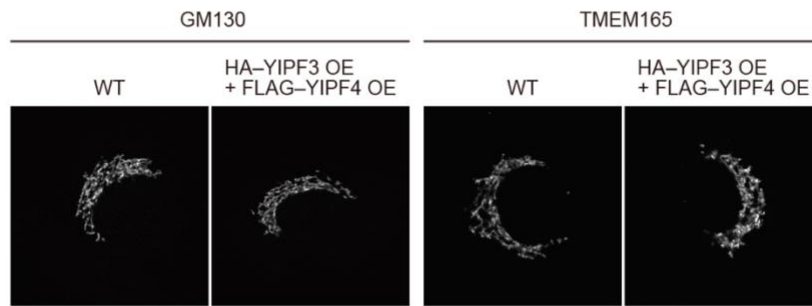

**Appendix Figure S1. The Golgi morphology is not changed in cells stably coexpressing YIPF3 and YIPF4**

Immunofluorescence image of WT MEFs and MEFs stably coexpressing HA-YIPF3 and FLAG-YIPF4 under growing conditions. Cells were stained with anti-GM130 or anti-TMEM165 antibodies. Scale bars, 10  $\mu$ m.
