# Supplementary material for: YIPF3 and YIPF4 regulate autophagic turnover of the Golgi apparatus
Source: PubMed Central journal article supplement (PMC11250848; doi:10.1038/s44318-024-00131-3), 2024-05-31
Supplement: 44318_2024_131_MOESM14_ESM.pdf [file 44318_2024_131_MOESM14_ESM.pdf]

## Expanded View Figures

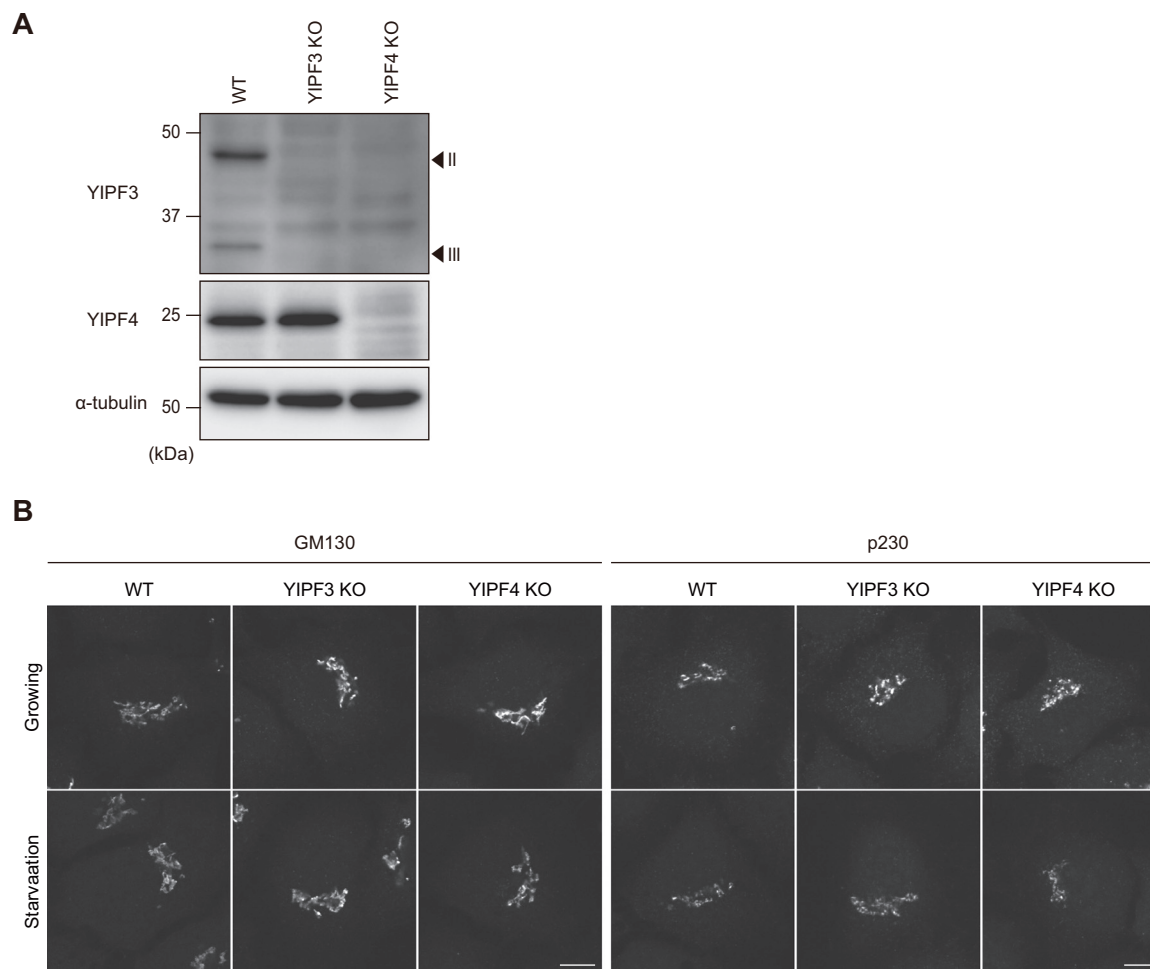

**Figure EV1. Loss of YIPF4 suppresses YIPF3 protein levels.**

(A) Immunoblotting of indicated proteins in WT, YIPF3-KO, and YIPF4-KO HeLa cells. (B) Immunofluorescence image of WT, YIPF3-KO and YIPF4-KO HeLa cells. Cells were cultured in DMEM or EBSS (9 h) and stained with anti-GM130 or anti-p230 antibodies. Scale bars, 10  $\mu$ m. Source data are available online for this figure.

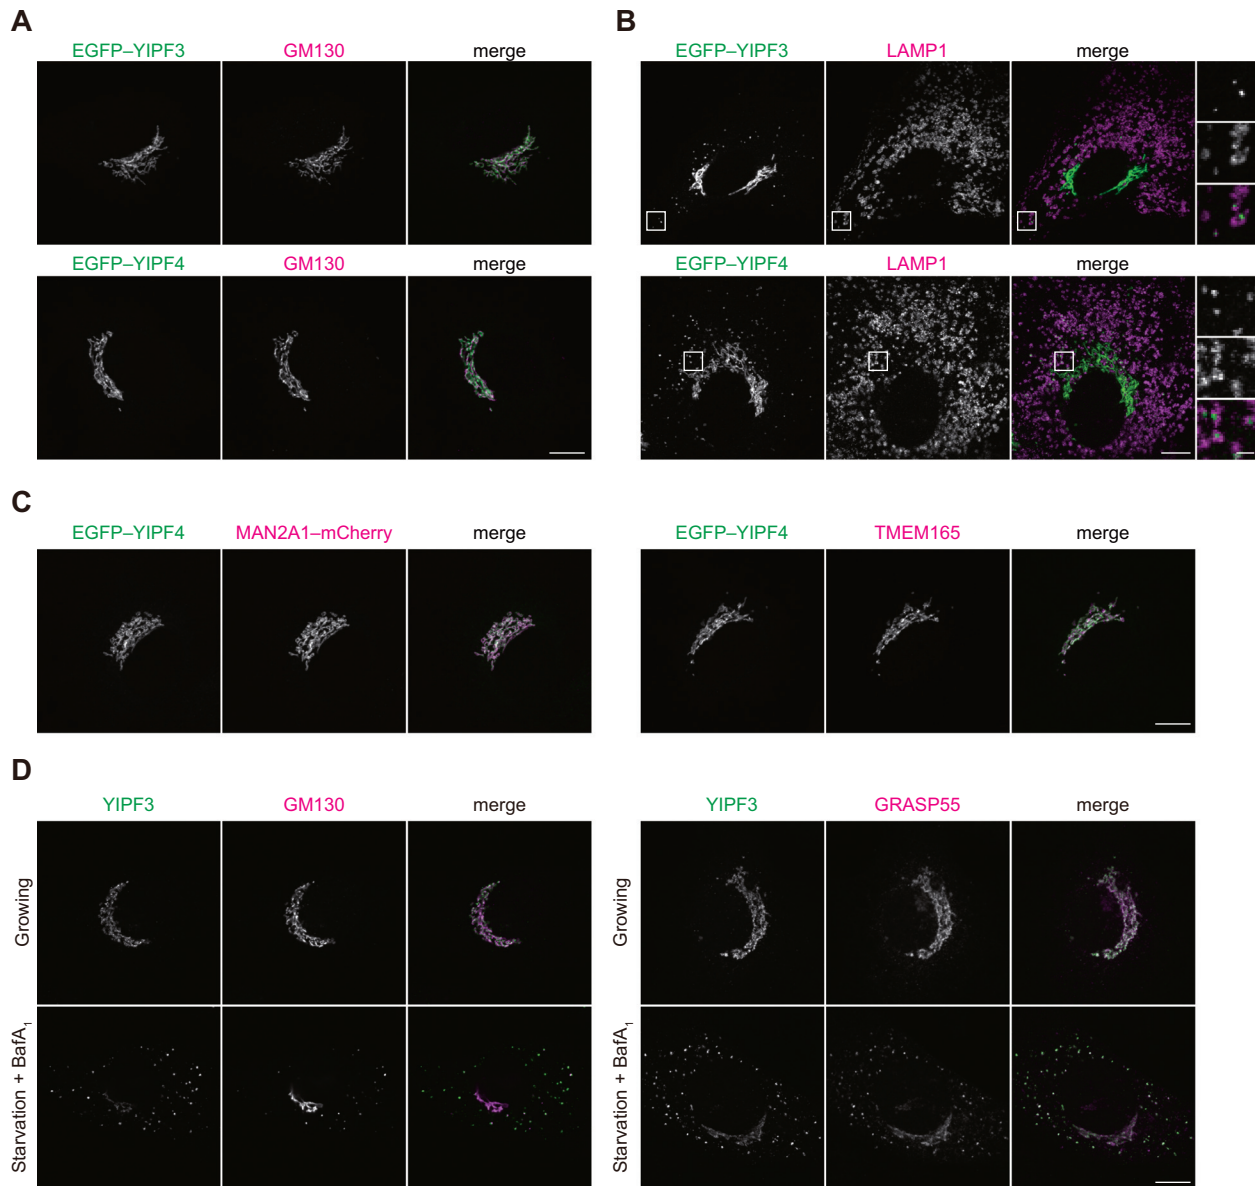

**Figure EV2. EGFP-YIPF3 and EGFP-YIPF4 are localized to the Golgi apparatus under growing conditions, related to Fig. 2.**

(A) Immunofluorescence image of MEFs stably expressing EGFP-YIPF3 or EGFP-YIPF4. Cells were cultured in DMEM and stained with anti-GM130 antibody. Scale bars, 10 μm and 1 μm (insets). (B) Immunofluorescence image of MEFs stably expressing EGFP-YIPF3 or EGFP-YIPF4. Cells were cultured in EBSS (2 h) in the presence of 125 nM Baf A<sub>1</sub> and stained with anti-LAMP1 antibodies. Scale bars, 10 μm and 1 μm (insets). (C) Immunofluorescence image of MEFs stably expressing EGFP-YIPF4 or coexpressing EGFP-YIPF4 and MAN2A1-mCherry. Cells were cultured in DMEM. The indicated cells were stained with anti-TMEM165 antibody. Scale bars, 10 μm. (D) Immunofluorescence image of MEFs cultured in DMEM or EBSS (6 h) in the presence of 125 nM Baf A<sub>1</sub>. Each cell was stained with anti-YIPF3 antibody and the indicated cells were stained with anti-GM130 (*cis*-Golgi) or anti-GRASP55 (*medial*-Golgi) antibodies. Scale bars, 10 μm. The ratio of YIPF3 puncta positive for each Golgi protein to total YIPF3 puncta was quantified in three independent experiments (mean ± SD). Ten cells were analyzed per condition in each experiment. Source data are available online for this figure.

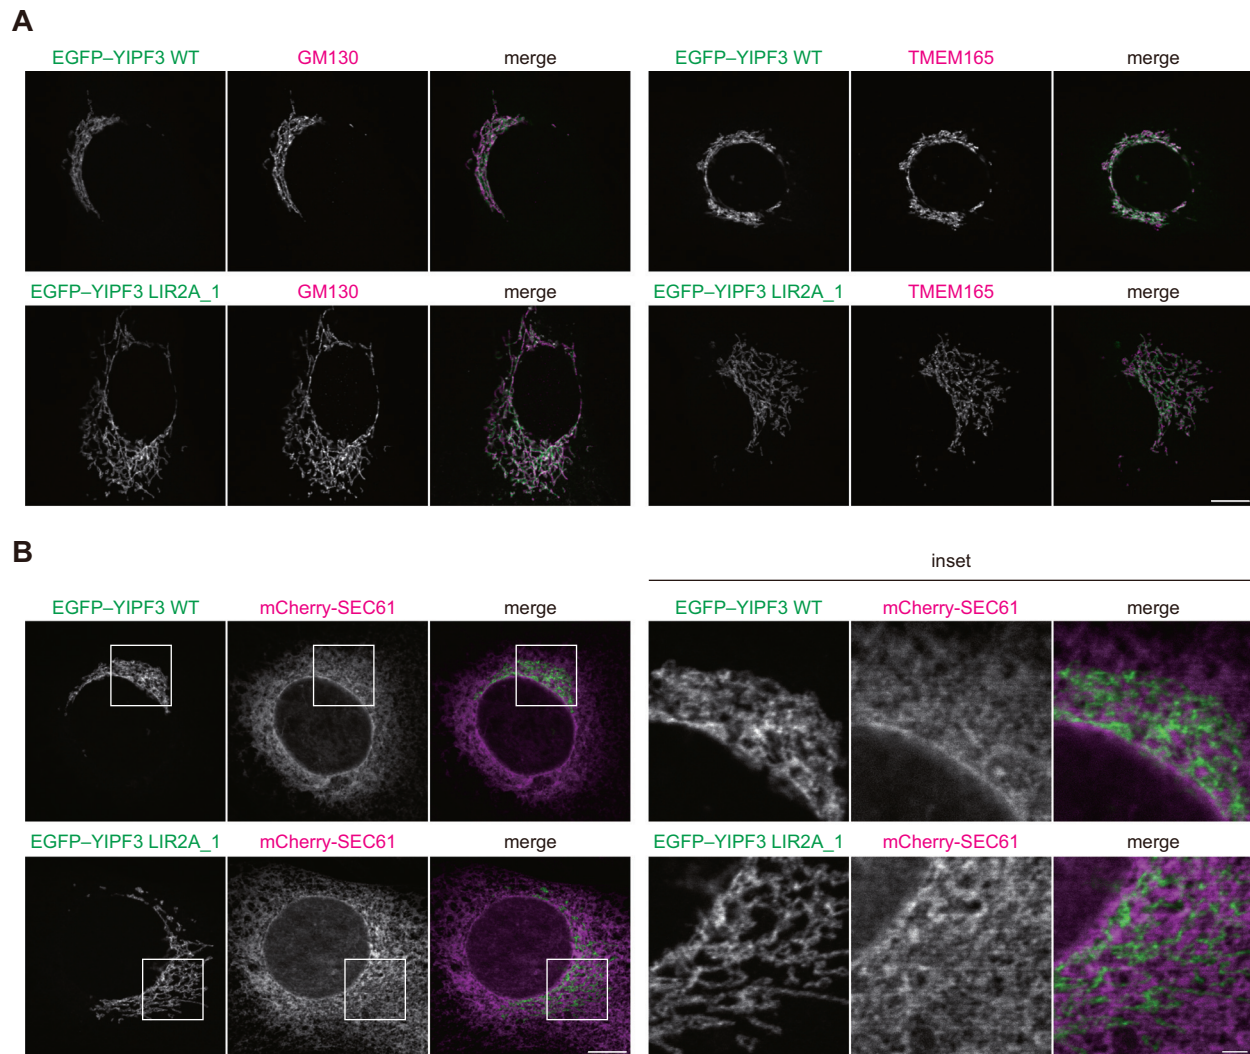

**Figure EV3. The Golgi apparatus is partially discontinuous and expanded in cells stably expressing YIPF3 LIR2A mutant.**

(A) Immunofluorescence image of MEFs stably expressing EGFP-YIPF3 WT or EGFP-YIPF3 LIR2A\_1 under growing conditions. Cells were stained with anti-GM130 or anti-TMEM165 antibodies. Scale bars, 10  $\mu$ m. (B) Immunofluorescence image of MEFs stably coexpressing EGFP-YIPF3 WT or EGFP-YIPF3 LIR2A\_1 and mCherry-SEC61 under growing conditions. Scale bars, 10  $\mu$ m and 2  $\mu$ m (insets). Source data are available online for this figure.

**A**

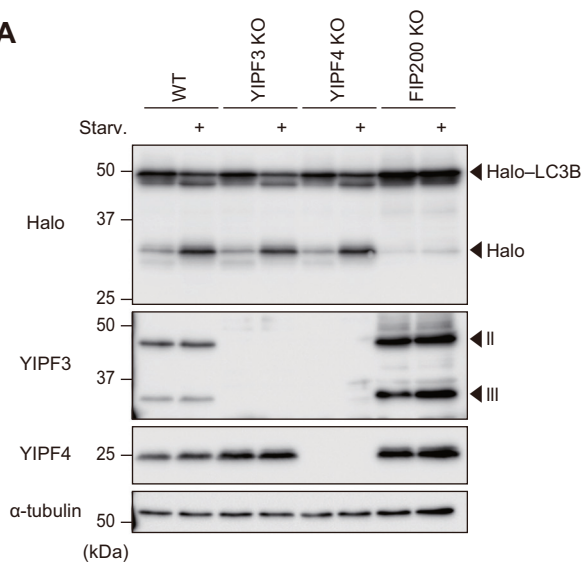

**B**

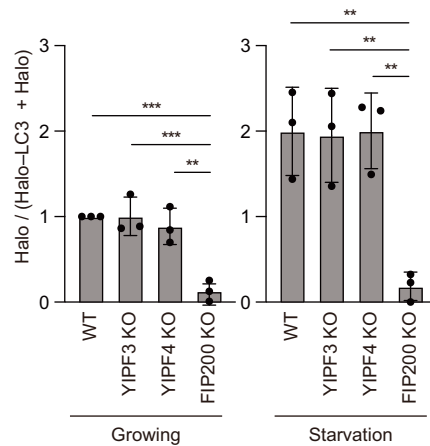

**C**

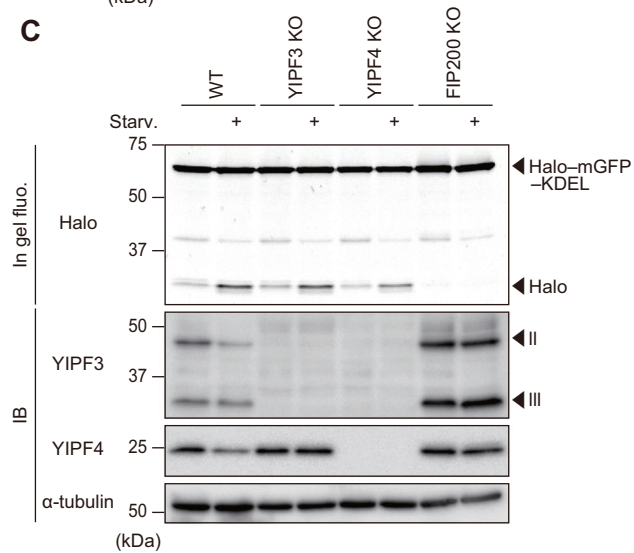

**D**

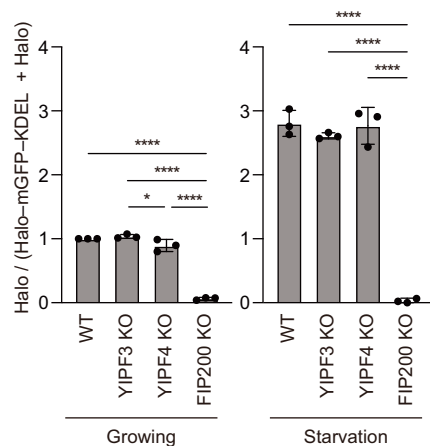

**E**

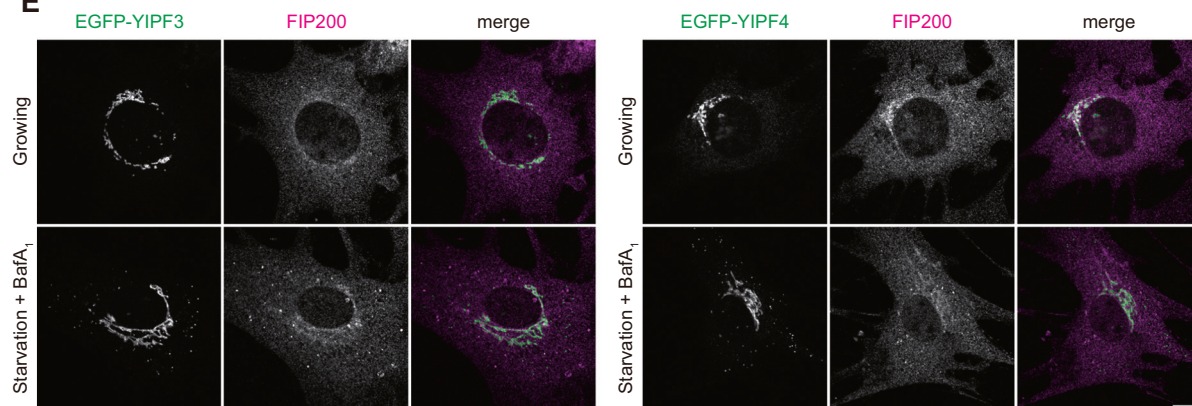

**◀ Figure EV4. YIPF3 and YIPF4 are not involved in nonselective bulk autophagy and ER-phagy.**

(A) Immunoblotting of indicated proteins in WT, YIPF3-KO, YIPF4-KO, and FIP200-KO HeLa cells stably expressing Halo-LC3B. After cells were cultured in the presence of TMR-conjugated ligands for 20 min and washed out, they were cultured in DMEM or EBSS for 4 h. (B) Quantification of results shown in (A). The ratio of Halo:Halo-LC3B is shown. Each ratio is normalized to WT cultured in nutrient-rich medium. Error bars indicate mean  $\pm$  SD ( $n = 3$  independent experiments). (C) In-gel fluorescence image of Halo and immunoblotting of indicated proteins in WT, YIPF3-KO, YIPF4-KO, and FIP200-KO HeLa cells stably expressing Halo-mGFP-KDEL. After cells were cultured in the presence of TMR-conjugated ligands for 20 min and washed out, they were cultured in DMEM or EBSS for 9 h. (D) Quantification of results shown in (C). The ratio of Halo:Halo-mGFP-KDEL is shown. Each ratio is normalized to WT cultured in nutrient-rich medium. Error bars indicate mean  $\pm$  SD ( $n = 3$  independent experiments). (E) Immunofluorescence image of MEFs stably expressing EGFP-YIPF3 or EGFP-YIPF4 cultured in DMEM or EBSS in the presence of 125 nM Baf A<sub>1</sub> for 2 h. Cells were stained with anti-FIP200 antibodies. Scale bars, 10  $\mu$ m. Data information:  $P$  values were determined using one-way ANOVA with Tukey's multiple comparisons test (B, D). Symbols indicate: \* $P \leq 0.05$ ; \*\* $P \leq 0.01$ , \*\*\* $P \leq 0.001$ , \*\*\*\* $P \leq 0.0001$ . Source data are available online for this figure.

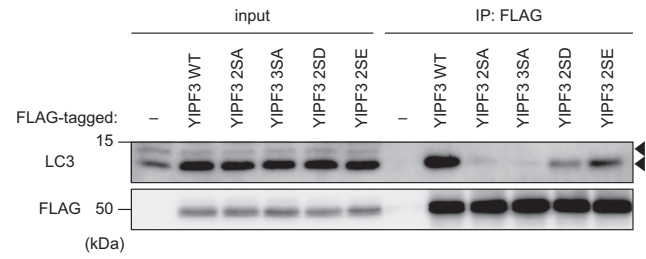

**Figure EV5. YIPF3 phosphomimetic mutants show reductions in their affinity to LC3.**

Immunoprecipitation of FLAG-YIPF3, FLAG-YIPF3<sup>S45A, S46A</sup> (2SA), FLAG-YIPF3<sup>S43A, S45A, S46A</sup> (3SA), FLAG-YIPF3<sup>S45D, S46D</sup> (2SD) or FLAG-YIPF3<sup>S45E, S46E</sup> (2SE) in HEK293T cells. Cells were transfected with FLAG-YIPF3 WT or each serine mutants. The lysates were immunoprecipitated with anti-FLAG antibody and detected with anti-LC3 and anti-FLAG antibodies. Source data are available online for this figure.
